# Supplementary material for: Narrow Precursor Mass Range for DIA–MS Enhances Protein Identification and Quantification in Arabidopsis
Source: MDPI journal article supplement (doi:10.3390/life11090982), 2021-09-18

Supplementary material 1, Example shows how DIA-MS identified and quantified one peptide of ALBU\_BOVIN.

1). DIA-MS spectra matching with spectral library and identified a peptide sequence RHPYFYAPELLYYANK ( $z = 3+$ ) which belongs to the protein ALBU-BOVIN.

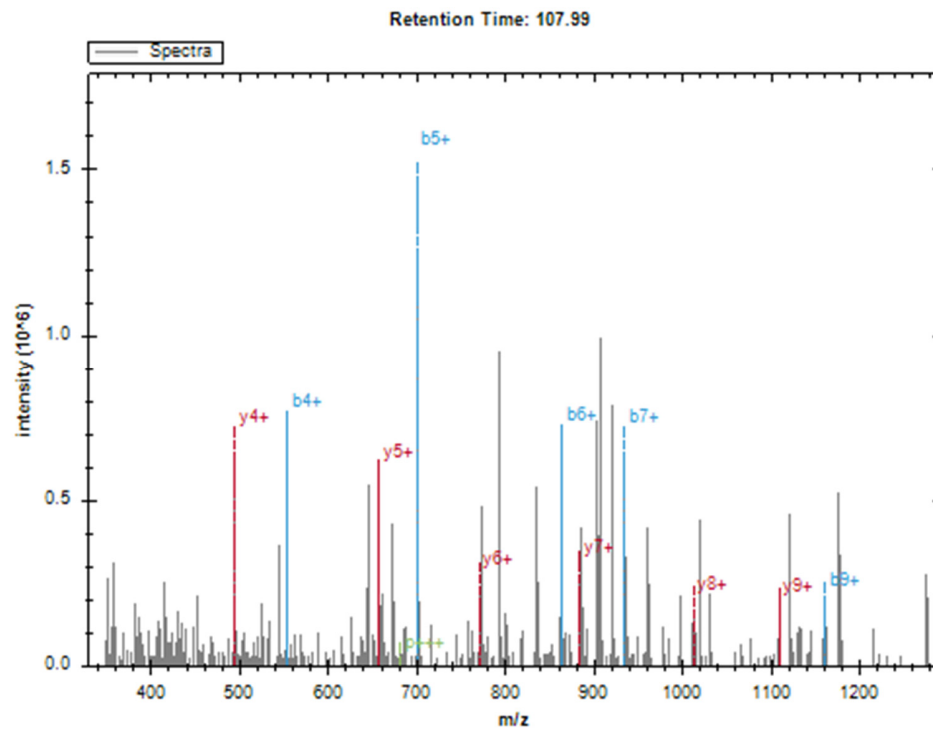

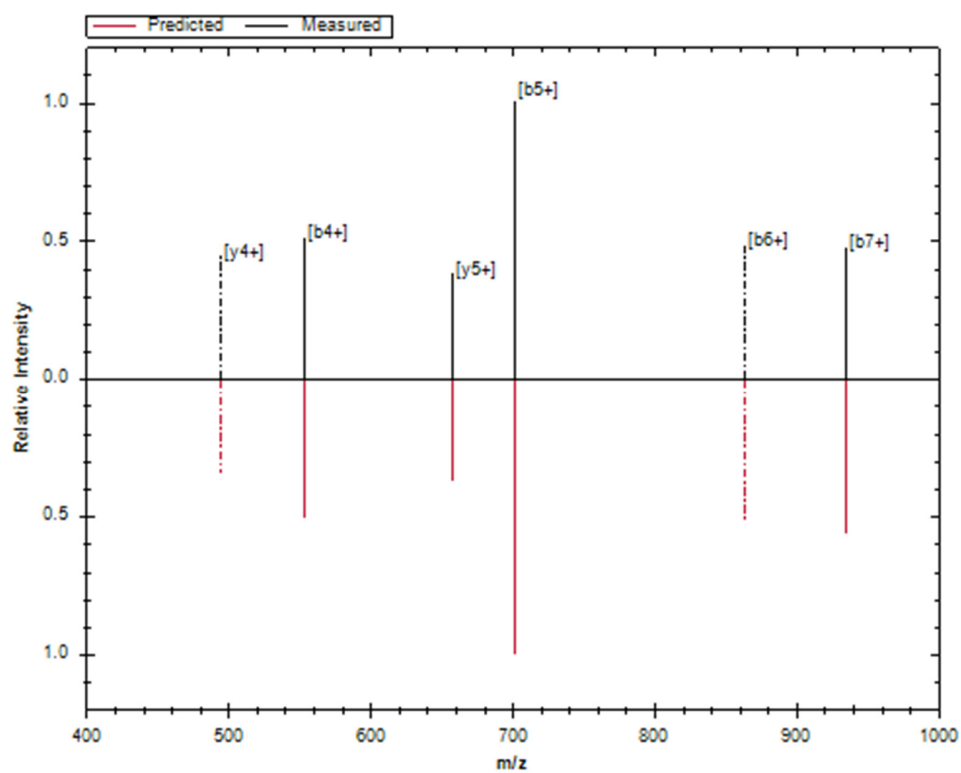

2). MS2 XIC across all runs to generate quantitation information

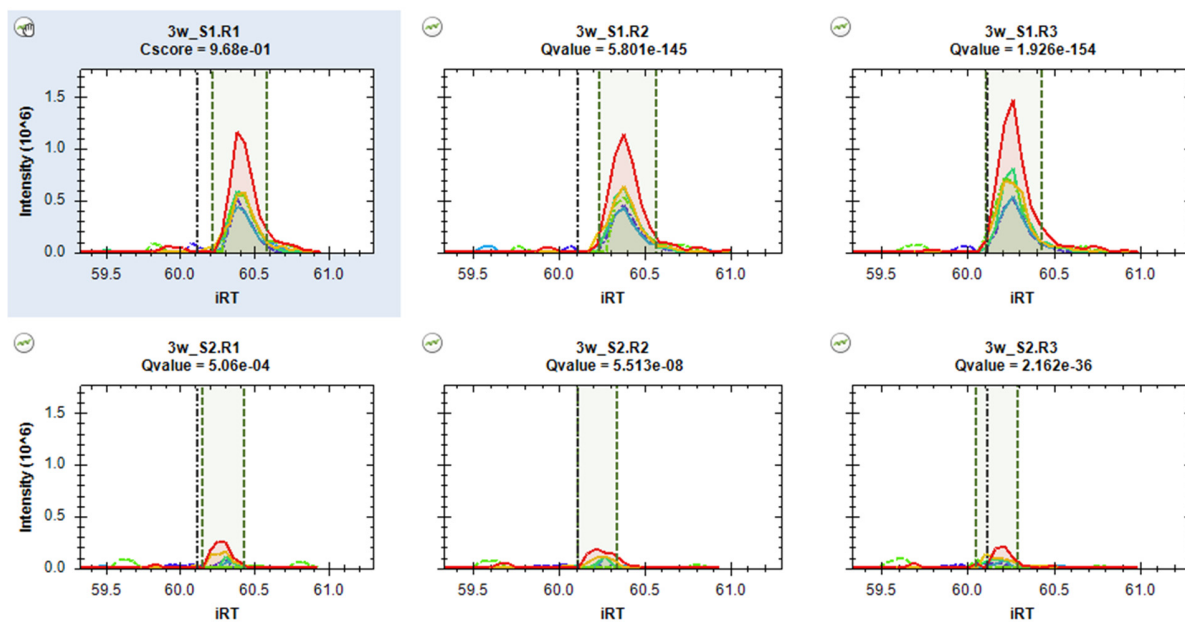

Supplementary material 2. Quantitation of spike-in proteins using cDIA-MS and cGPF-DIA-MS. The upper figure indicates protein quantitation, and the lower panel indicates peptide quantitation for the protein (the dot in the same line represents a same analyte).

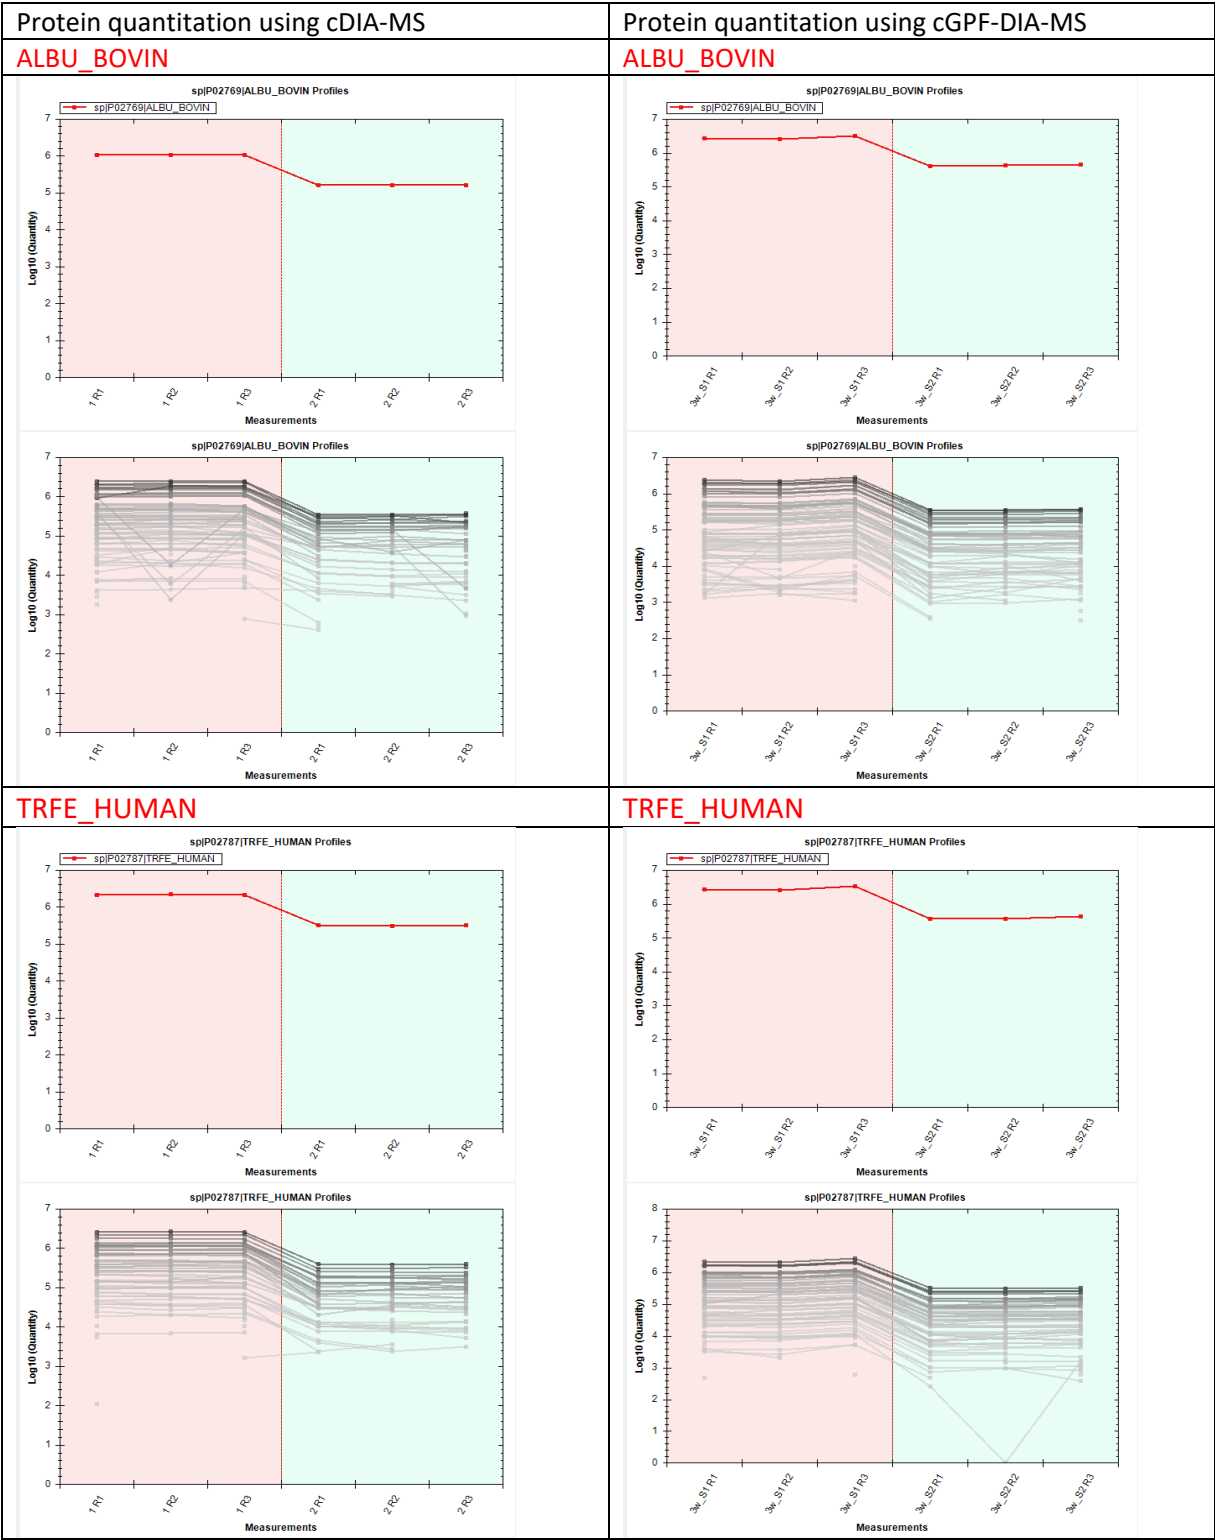

OVAL\_CHICK

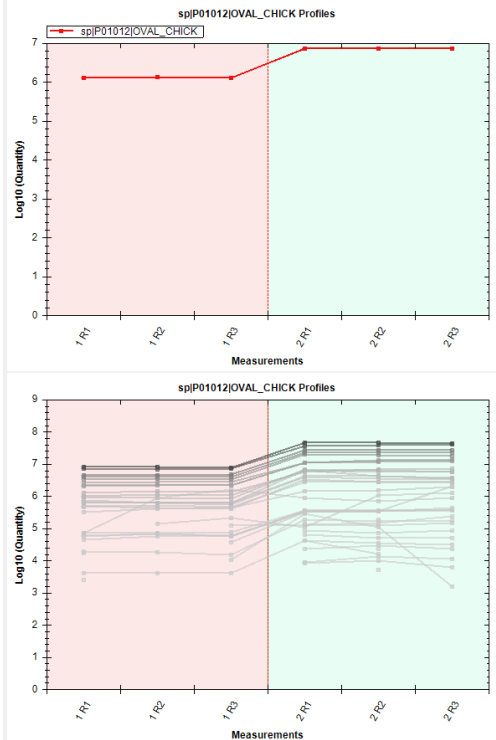

OVAL\_CHICK

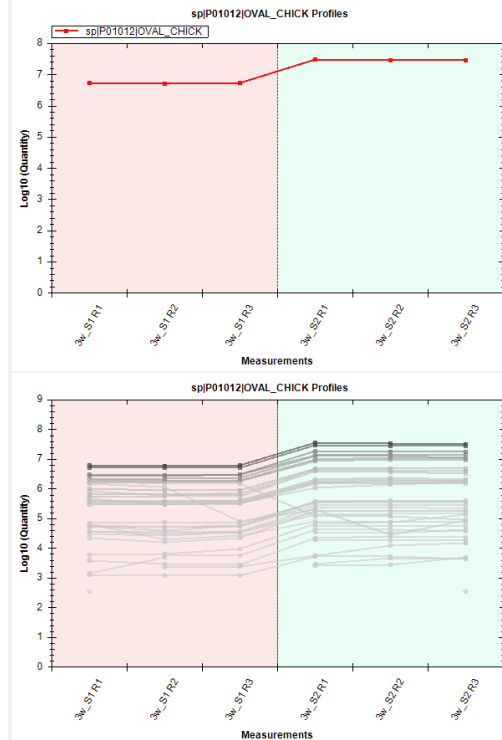

LYSC\_CHICK

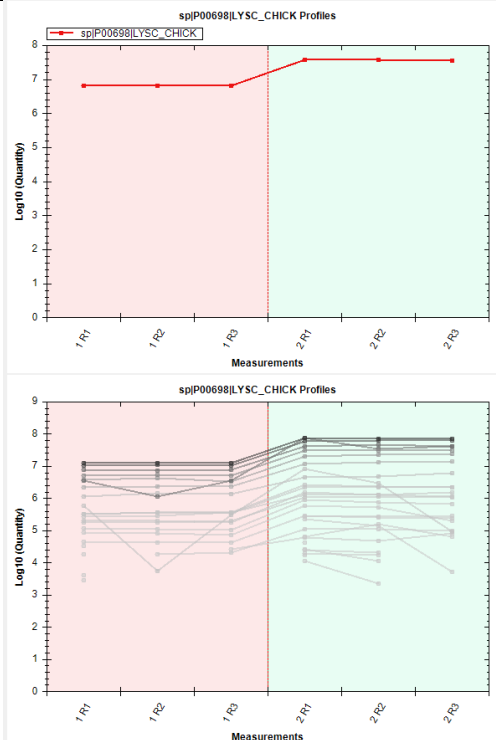

LYSC\_CHICK

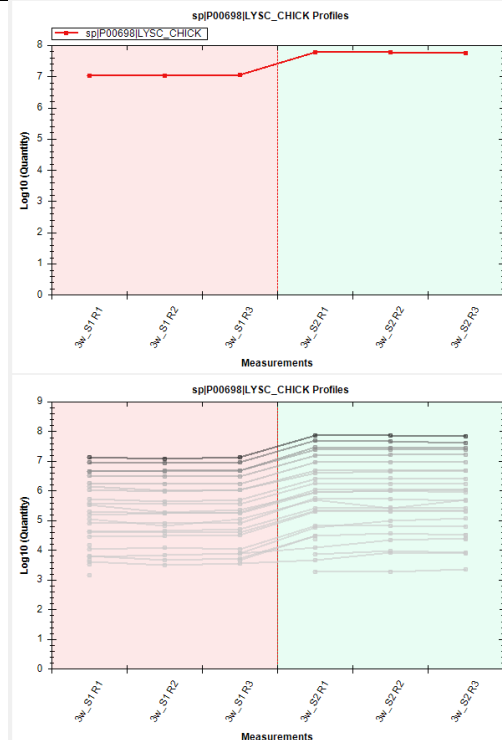

A1AG\_BOVIN

A1AG\_BOVIN

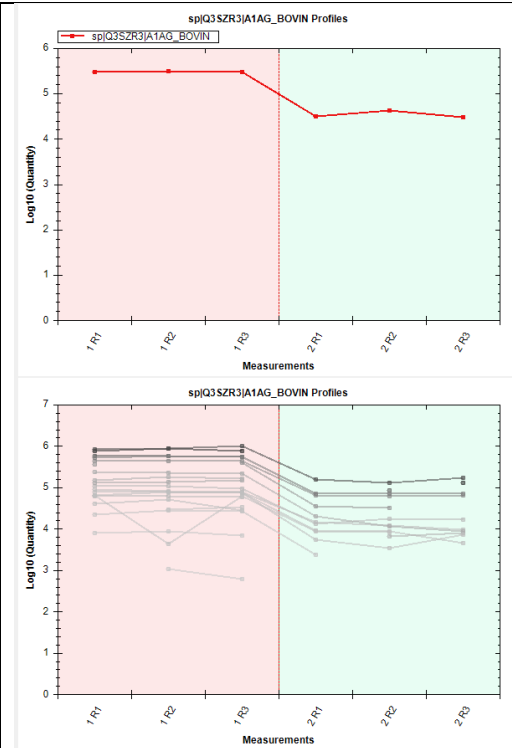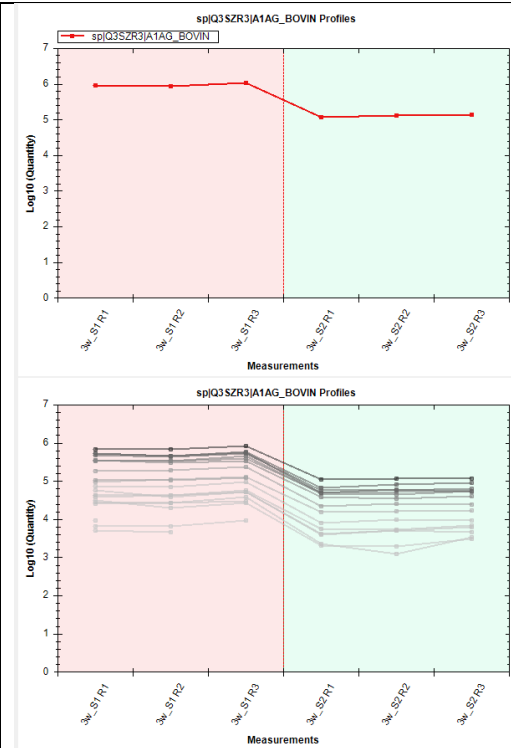

FETUB\_BOVIN

Not detected as significant change

FETUB\_BOVIN

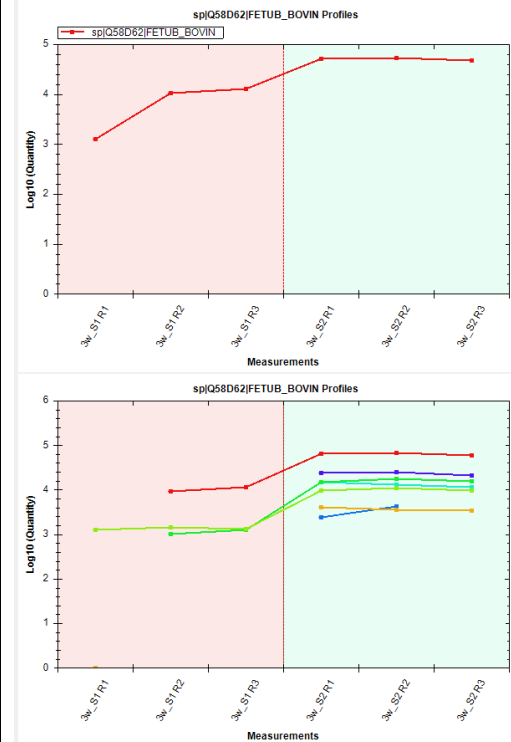

Supplementary material 3, venn diagram shows the protein identified from cGPF-DIA-MS and cDIA-MS analysis.

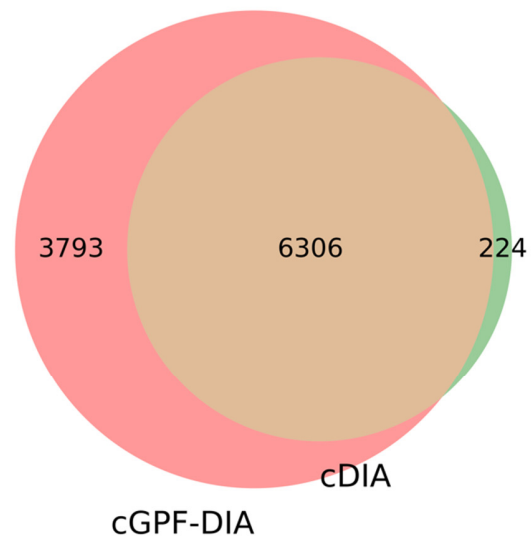

Supplement: s1 [file s1]
